# Supplementary material for: Lycium barbarum polysaccharide enhances development of previously-cryopreserved murine two-cell embryos via restoration of mitochondrial function and down-regulated generation of reactive oxygen species
Source: PubMed Central journal article supplement — J Reprod Dev. 2019 Jan 31;65(2):163–70. doi: 10.1262/jrd.2018-104 (PMC6473105; doi:10.1262/jrd.2018-104), 2019-01-31
Supplement: jrd-65-163-s001.pdf [file jrd-65-163-s001.pdf]

**Supplementary Table 1.** Primer sequences used for RT-qPCR.

| Gene          | Forward (5'-3')          | Reverse (5'-3')          | T <sub>m</sub> (°C) |
|---------------|--------------------------|--------------------------|---------------------|
| <i>GPX4</i>   | CCACTGTGGAAATGGATGAAAGTC | CACGCAGCCGTTCTTATCAATG   | 60                  |
| <i>SOD1</i>   | AACCAGTTGTGTTGTCAGGAC    | CCACCATGTTTCTTAGAGTGAGG  | 60                  |
| <i>MT-ND5</i> | ATAGCCTGGCAGACGAACAAGACA | AATTAGTAGGGCTCAGGCGTTGGT | 60                  |
| <i>SIRT1</i>  | TGTGAAGTTACTGCAGGAGTGTA  | GCATAGATACCGTCTCTTGATCTG | 60                  |
| <i>BAX</i>    | AGGATGCGTCCACCAAGAA      | CAAAGTAGAAGAGGGCAACCAC   | 60                  |
| <i>BCL2</i>   | CGAGAAGAAGAGGGAATCACAGG  | AATCCGTAGGAATCCCAACC     | 60                  |
| <i>GAPDH</i>  | AATGGATTTGGACGCATTGGT    | TTTGCCTGGTACGTGTTGAT     | 60                  |
